# Supplementary material
Source: PubMed Central journal article supplement (PMC4207986)
Supplement: supp_M114.603084_jbc.M114.603084-1.pdf [file supp_M114.603084_jbc.M114.603084-1.pdf]

**SUPPLEMENTARY DATA**

Endoplasmic Reticulum-Associated Inactivation of the Hormone Jasmonoyl-L-Isoleucine by Multiple Members of Cytochrome P450 94 Family in Arabidopsis

**Abraham J. Koo<sup>1,4,5</sup>, Caitlin Thireault<sup>1</sup>, Starla Zemelis<sup>1</sup>, Arati N. Poudel<sup>4,5,6</sup>, Tong Zhang<sup>4,5</sup>, Naoki Kitaoka<sup>3</sup>, Federica Brandizzi<sup>1</sup>, Hideyuki Matsuura<sup>3</sup>, and Gregg A. Howe<sup>1,2</sup>**

From the <sup>1</sup>Department of Energy-Plant Research Laboratory and <sup>2</sup>Department of Biochemistry and Molecular Biology, Michigan State University, East Lansing, MI 48824; and <sup>3</sup>Division of Applied Bioscience, Research Faculty of Agriculture, Hokkaido University, Sapporo 060-8589, Japan; and <sup>4</sup>the Division of Biochemistry, <sup>5</sup>Interdisciplinary Plant Group, <sup>6</sup>Division of Plant Sciences, University of Missouri, Columbia, MO 65211.

**Table S1.** Primers used in this study

|                                               | Primer name      | Primer sequences (5' – 3')           |
|-----------------------------------------------|------------------|--------------------------------------|
| T-DNA genotyping                              |                  |                                      |
| T-DNA                                         | LBb1             | gcgtggaccgcttgctgcaact               |
|                                               | o8760            | gggctacactgaattggtagctc              |
| <i>cyp94b3-1</i>                              | P4502GABIkoRP    | gcaaagcaagatctttgtcg                 |
|                                               | P4502GABIkoLP    | taaggctggatgctgcaatac                |
| <i>cyp94b1-1</i>                              | jh3ckoF1         | aaccgccaccgtcttctccaat               |
|                                               | jh3ckoR1         | ttgagaggtgttccatctggca               |
| <i>cyp94b1-2</i>                              | jh3cF2           | ttcaccgacctcctaggagatc               |
|                                               | jh3cR2           | ccatgtgagcggtagaagagg                |
| <i>ill6-1</i>                                 | Salk024894.LP    | gactatgcttcttggtgctgc                |
|                                               | Salk024894.RP    | cgcacctcttgaatacgttcc                |
| Northern probe                                |                  |                                      |
| <i>CYP94B3</i>                                | P450-2probe3'F   | cggccgggttttctctct                   |
|                                               | P450-2probe3'R   | gcttcaacatctacatggccag               |
| <i>CYP94B1</i>                                | P450-3 3'probeF2 | gagagagcaatgtattc gatg               |
|                                               | P4503koLP        | gtatcggaccaatcgtcacag                |
| <i>ACT8</i>                                   | ACT8RTF1         | agggtttctcactccacatgct               |
|                                               | ACT8RTR1         | ggacaatgcctggacctgct                 |
| RT-PCR                                        |                  |                                      |
| <i>CYP94B3</i>                                | P4502GABIkoRP    | gcaaagcaagatctttgtcg                 |
|                                               | JH2 taa R        | ttaaacgttgtaaggatgtgactcttctcttg     |
| <i>CYP94B1</i>                                | P4503koRP        | aaagaaaagcctcgatcgg                  |
|                                               | jh3c koR2        | ccatgtgagcggtagaagagg                |
| <i>ACT8</i>                                   | ACT8RTF1         | agggtttctcactccacatgct               |
|                                               | ACT8RT2          | ccagacactgtacttctctcg                |
|                                               | ACT8RTR1         | ggacaatgcctggacctgct                 |
| <i>CYP94B1-OE</i> construct                   |                  |                                      |
|                                               | JH3_XbaI F       | ttaatctagaatggaaatgctcaacgcaataattct |
|                                               | JH3_XhoI R1      | cggctcgagttaataatacatcgaatcacattgct  |
| <i>CYP94B1</i> construct for yeast expression |                  |                                      |
|                                               | JH3_XmaI_F       | ttcccgggatggaaatgctcaacgcaataattct   |
|                                               | JH3_XmaI_R       | ttcccgggttaataatacatcgaatcacattgct   |

Table S1. Continued

*Promoter-GUS* constructs

|                |                      |                                  |
|----------------|----------------------|----------------------------------|
| <i>CYP94B1</i> | JH3 promoter F1 ClaI | ccatcgatgcagccaacacgagcttaa      |
|                | JH3 promoter R1 XmaI | ttcccggggcggttgagcatttccattt     |
| <i>CYP94B3</i> | JH2 promoter F2 ClaI | ccatcgatgcatggattgaggctaaaaggcta |
|                | JH2 promoter R3 XmaI | tccccggggtcagaagaaatgcatattgt    |

*CYP94-mRFP* constructs for subcellular localization

|                |          |                                         |
|----------------|----------|-----------------------------------------|
| <i>CYP94B3</i> | FBP-3875 | caggacgtctagatgttactaatcatatcattcaccatc |
|                | FBP-3876 | catgaccgtcgacttactccttcttggatcataaccgg  |
|                | FBP-3873 | tgatttgattcaagattcatggcg                |
|                | FBP-3874 | cgccatgaatcttgaatcaaatca                |
| <i>CYP94C1</i> | FBP-3879 | caggacgtctagatggcatttctctgagtttttgata   |
|                | FBP-3880 | catgaccgtcgacttaacgttgtaaggatgtgacttct  |
|                | FBP-3877 | catattcaatgtggacggtcactca               |
|                | FBP-3878 | tgagtgaccgtccacattgaatatg               |

---
